# Supplementary figures and images for: Extraction, purification, structural characterization and bioactivity of maize oligosaccharides: a review
Source: Royal Society of Chemistry journal article supplement (doi:10.1039/d5fo00791g), 2025-01-01

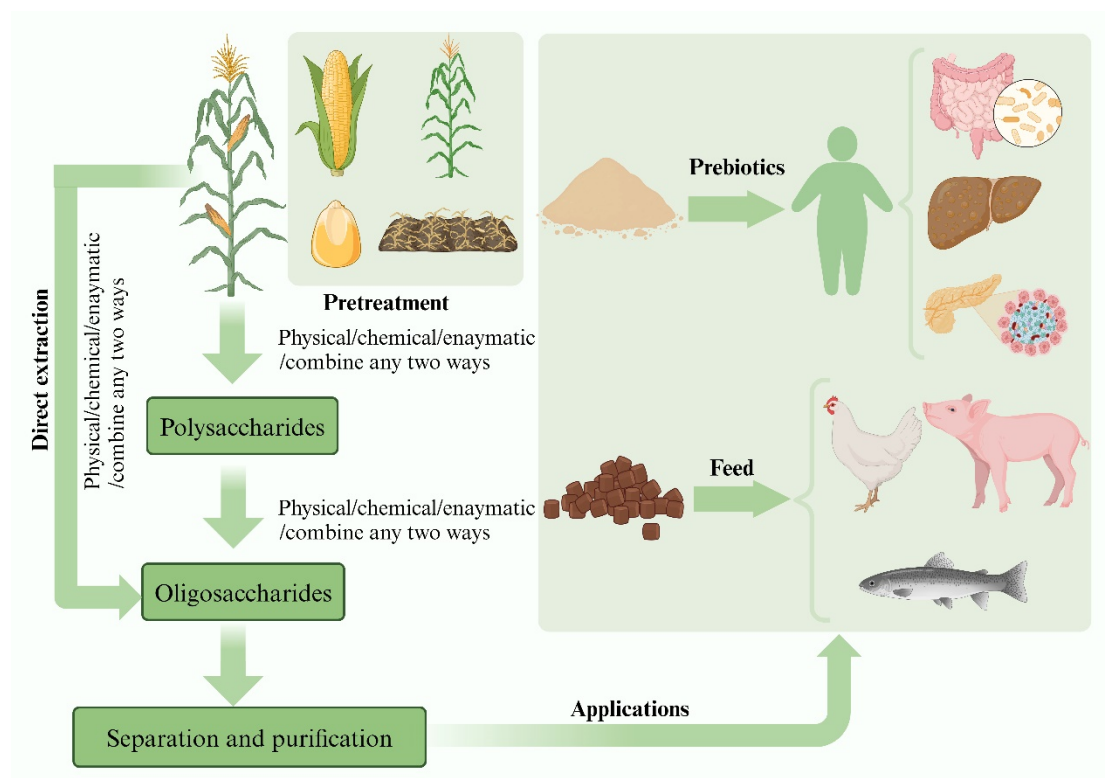

Graphical abstract

Supplement: d5fo00791g1.pdf [file d5fo00791g1.pdf]
